# Supplementary material for: Multi-strain Tn-Seq reveals common daptomycin resistance determinants in Staphylococcus aureus
Source: PubMed Central journal article supplement (PMC6934316; doi:10.1371/journal.ppat.1007862), 2019-11-18
Supplement: ppat.1007862.s001.pdf [file ppat.1007862.s001.pdf]

# Number of Genes Shared Between Strains

|         | HG003 | USA300 | MW2  | MSSA476 | MRSA252 |
|---------|-------|--------|------|---------|---------|
| HG003   | 2631  | 2466   | 2376 | 2378    | 2266    |
| USA300  |       | 2657   | 2392 | 2369    | 2318    |
| MW2     |       |        | 2565 | 2484    | 2267    |
| MSSA476 |       |        |      | 2545    | 2259    |
| MRSA252 |       |        |      |         | 2706    |
