# Supplementary material for: Multi-strain Tn-Seq reveals common daptomycin resistance determinants in Staphylococcus aureus
Source: PubMed Central journal article supplement (PMC6934316; doi:10.1371/journal.ppat.1007862), 2019-11-18

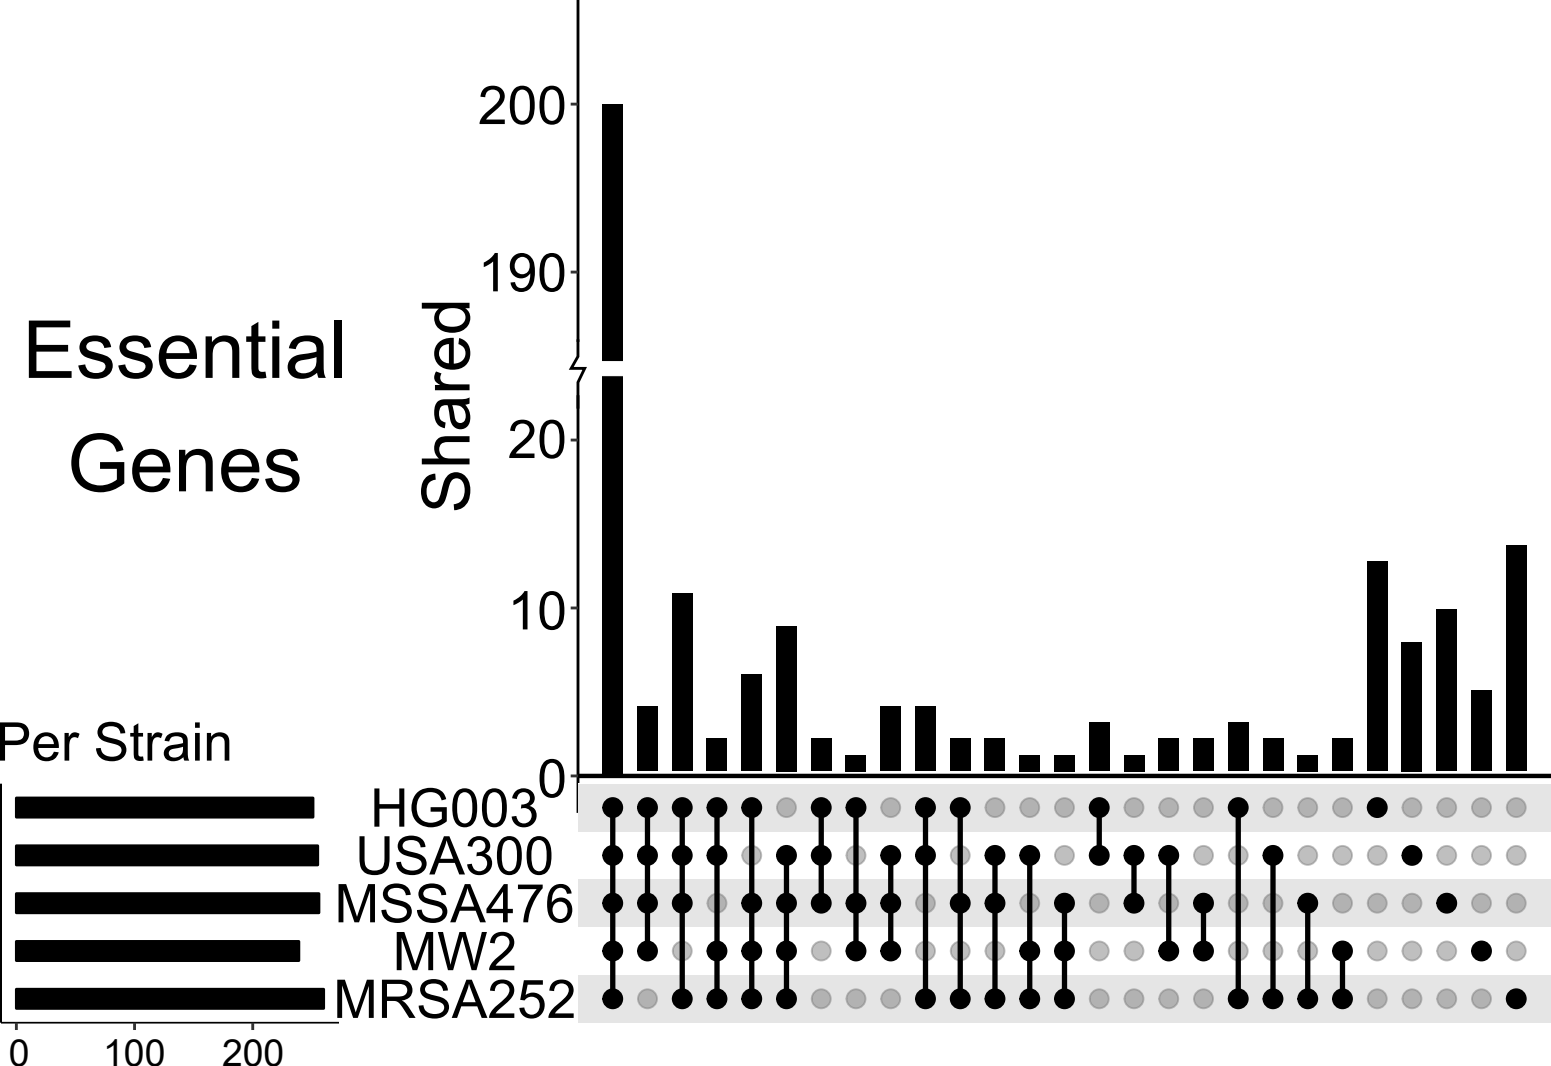

Supplement: ppat.1007862.s002.pdf [file ppat.1007862.s002.pdf]
