# Supplementary material for: Multi-strain Tn-Seq reveals common daptomycin resistance determinants in Staphylococcus aureus
Source: PubMed Central journal article supplement (PMC6934316; doi:10.1371/journal.ppat.1007862), 2019-11-18
Supplement: ppat.1007862.s008.pdf [file ppat.1007862.s008.pdf]

MW2

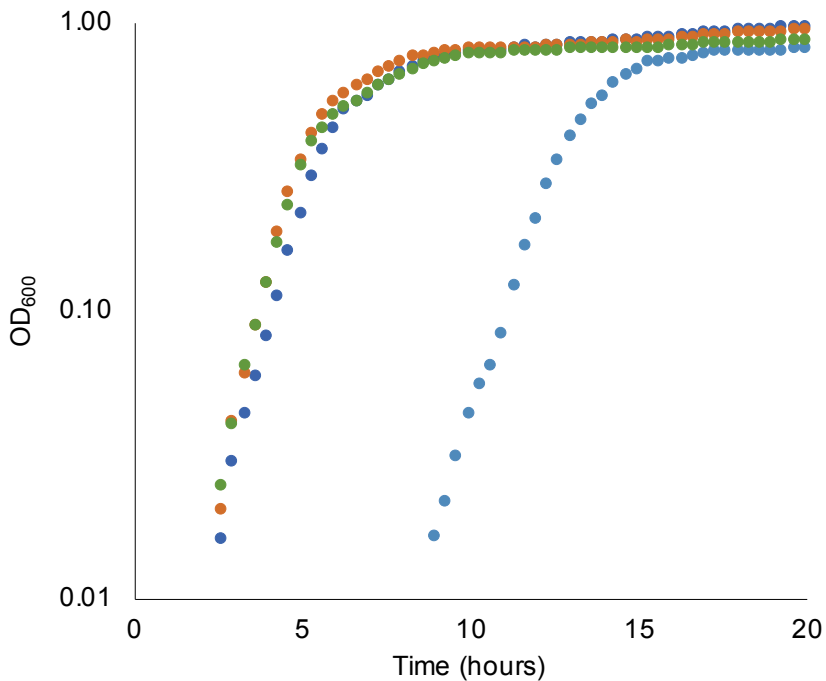

HG003

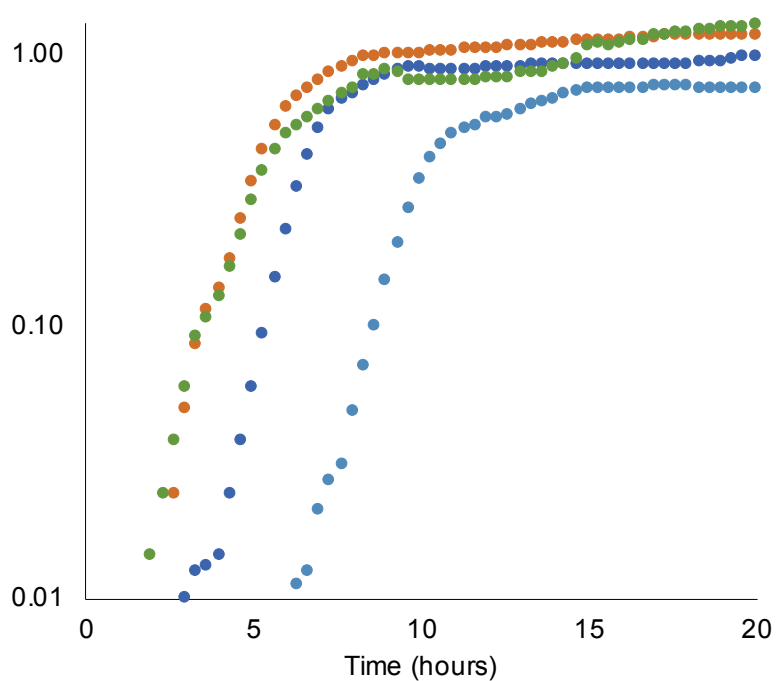

● WT - Daptomycin ● WT + Daptomycin ●  $\Delta ltaA$  - Daptomycin ●  $\Delta ltaA$  + Daptomycin
